# Supplementary material for: Bacterial Communities Associated with Houseflies (Musca domestica L.) Inhabiting Hospices in South Africa
Source: MDPI journal article supplement (doi:10.3390/microorganisms11061440), 2023-05-30
Supplement: s1 [file s1]

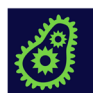

## Supplementary Materials

## Characterization of Bacterial Communities and Antibiotic Resistant Genes from Houseflies Inhabiting Hospices in South Africa

Maropeng C. Monyama <sup>1,2,\*</sup>, Oriel M. Taioe <sup>2,3</sup>, Jane S. Nkhebenyane <sup>4</sup>, Deidre van Wyk <sup>2</sup>, Tsepo Ramatla <sup>2</sup> and Oriel M. M. Thekiso <sup>2</sup>

**Citation:** Lastname, F.; Lastname, F.; Lastname, F. Title. *Microorganisms* **2022**, *10*, x. <https://doi.org/10.3390/xxxxx>

Academic Editor: Firstname Lastname

Received: date

Accepted: date

Published: date

**Publisher's Note:** MDPI stays neutral with regard to jurisdictional claims in published maps and institutional affiliations.

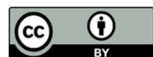

**Copyright:** © 2022 by the authors. Submitted for possible open access publication under the terms and conditions of the Creative Commons Attribution (CC BY) license (<https://creativecommons.org/licenses/by/4.0/>).

- <sup>1</sup> Department of Life and Consumer Sciences, University of South Africa, Florida 1710, South Africa  
<sup>2</sup> Unit for Environmental Sciences and Management, North-West University, Potchefstroom 2520, South Africa; taioem@arc.agric.za (O.M.T.); 20418876@nwu.ac.za (D.v.W.); ra21205450@gmail.com (T.R.); Oriel.Thekiso@nwu.ac.za (O.M.M.T.)  
<sup>3</sup> Epidemiology, Parasites and Vectors, Agricultural Research Council–Onderstepoort Veterinary Research, Pretoria 0110, South Africa  
<sup>4</sup> Department of Life Sciences, Central University of Technology, Bloemfontein 9300, South Africa; snkheben@cut.ac.za  
\* Correspondence: monyamc@unisa.ac.za; Tel.: +27-18-299-2521

**Abstract:** Houseflies are alleged reservoirs as well as vectors of human and animal pathogens, including bacteria, because they frequently have contact with animal excreta and decaying organic substances. The rapid adaptation process of ingested microbes in the insect gut may involve gene transfer, including antibiotic resistant determinants among different bacterial strains. As such, this study characterized bacterial communities harboured by houseflies collected from hospices using next-generation sequencing (NGS) platform and further sought to detect antibiotic resistance traits by gene-specific PCR assays. Gene sequence analysis revealed that the most abundant phyla detected with variable abundance observed among all houseflies were Proteobacteria, followed by Firmicutes, Bacteroidetes, and Actinobacteria. Furthermore, NGS data revealed the presence of multiple bacterial genera, including *Providencia*, *Enterobacter*, *Dysgonomonas*, *Escherichia-Shigella*, *Klebsiella*, *Pseudomonas*, and *Streptococcus*, which are known to harbour potentially pathogenic species of animals and humans. Antibiotic resistant genes detected from the housefly DNA in this study included *ermB*, *tetA*, *blaSHV*, and *blaTEM*. Furthermore, these genes are associated with resistance to erythromycin, tetracycline, and beta-lactams antibiotics respectively. The presence of bacterial pathogens and detection of antibiotic resistant genes from houseflies collected from the hospices indicates the possible health risk to patients in hospices and the surrounding community. Therefore, it is imperative to keep high standards of hygiene, food preparation, safety, and control of houseflies in hospices.

**Keywords:** bacterial communities; 16S *Rrna*; houseflies, resistance genes

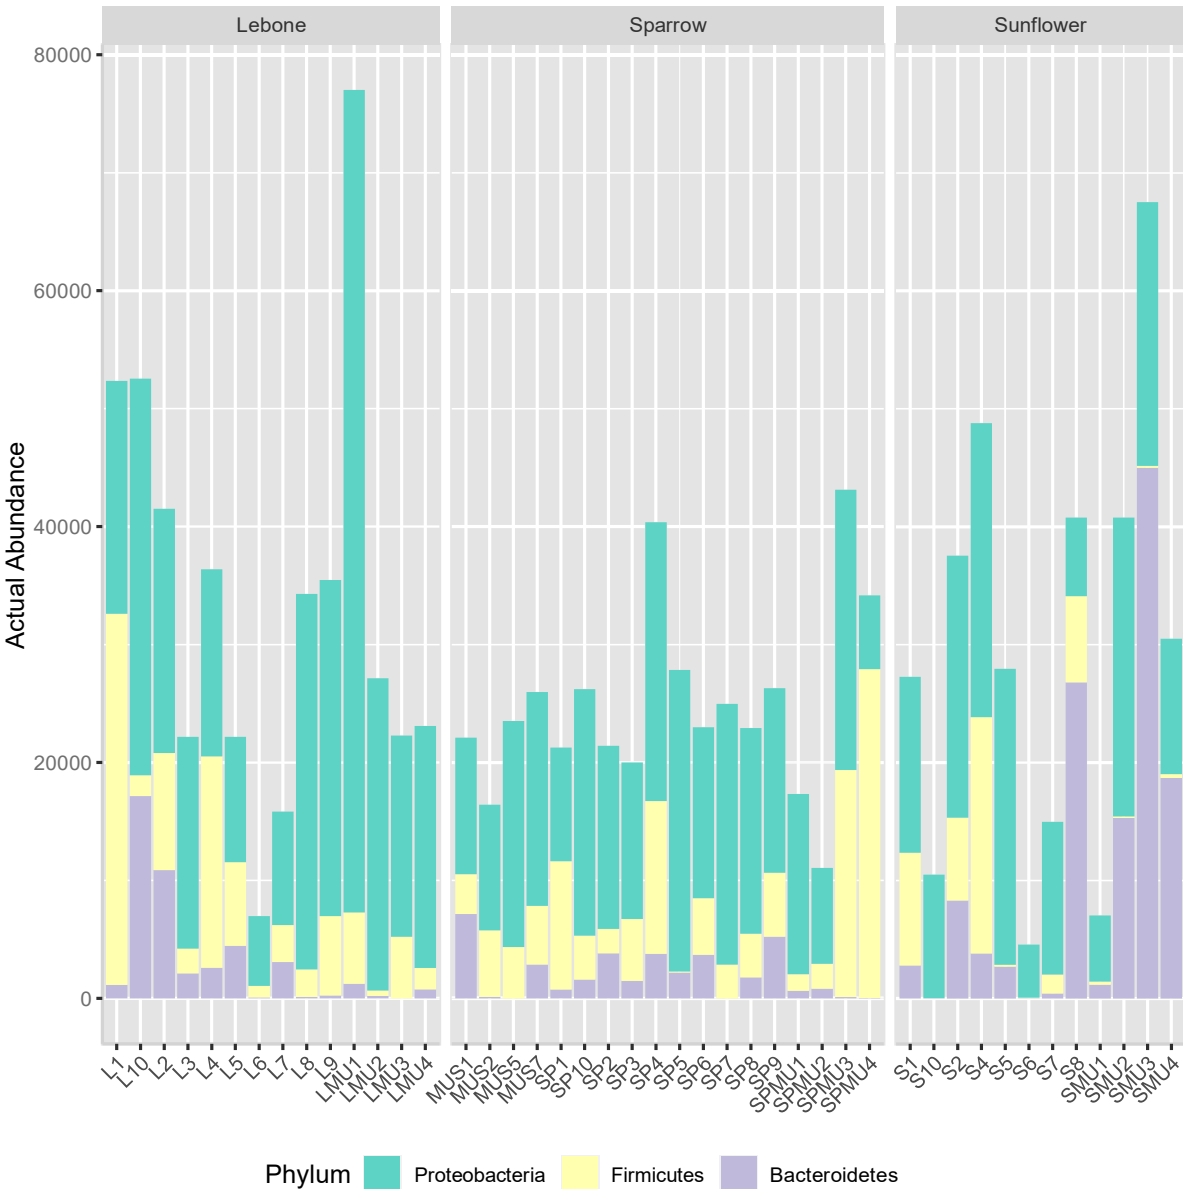

**Figure S1.** A stacked bar plot showing relative abundance of bacterial phyla detected from houseflies collected from three hospices in Bloemfontein and Johannesburg cities.

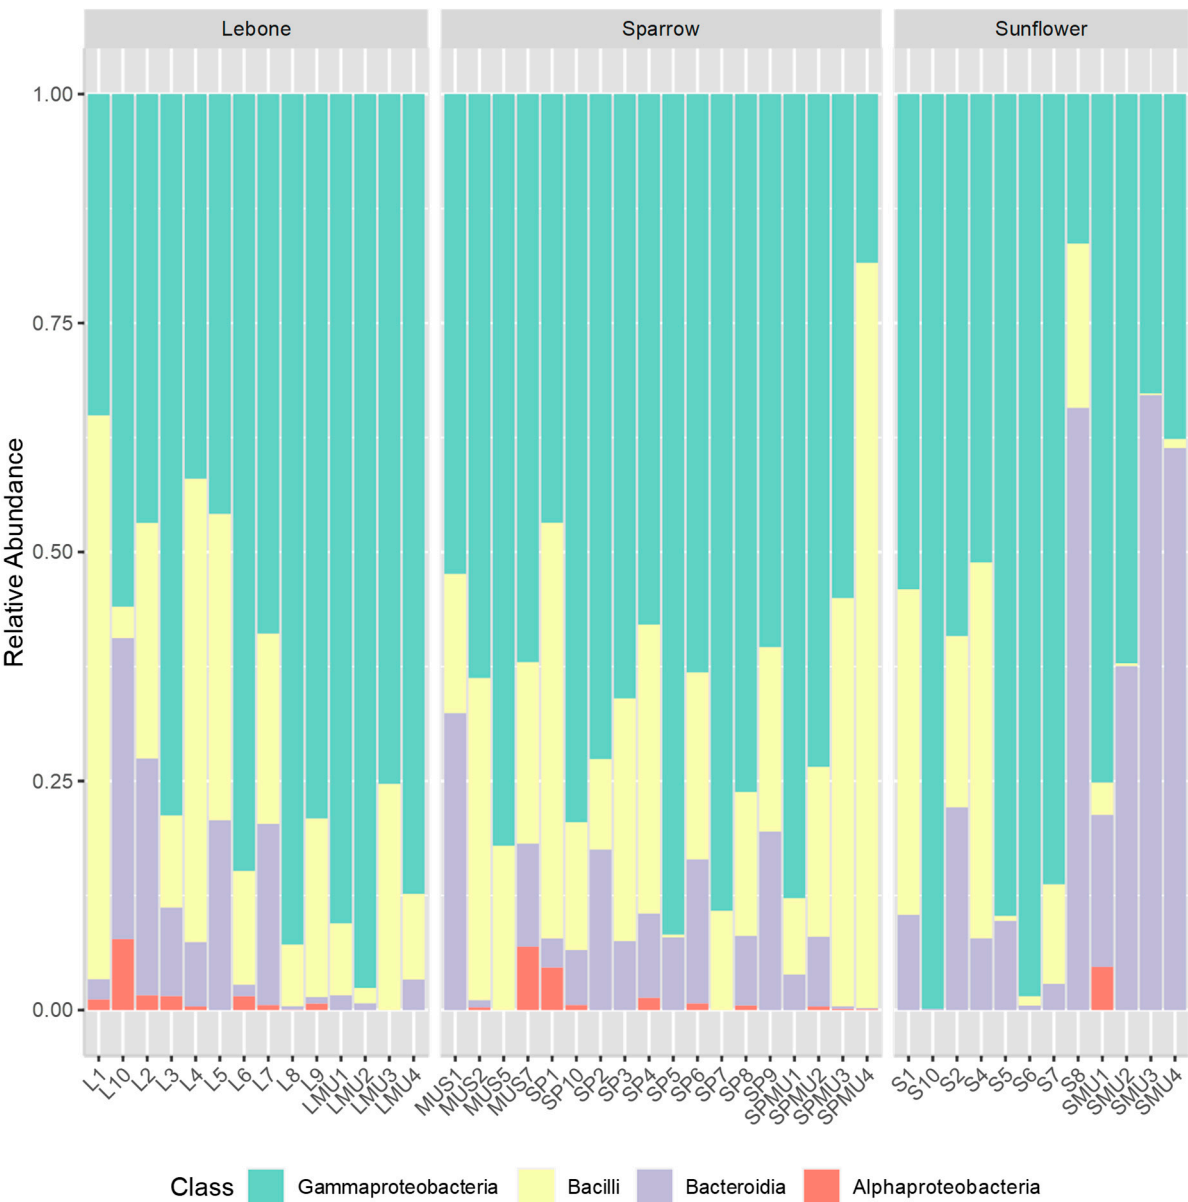

**Figure S2.** A stacked bar plot showing relative abundance of bacterial class detected from houseflies collected from three hospices in Bloemfontein and Johannesburg cities.

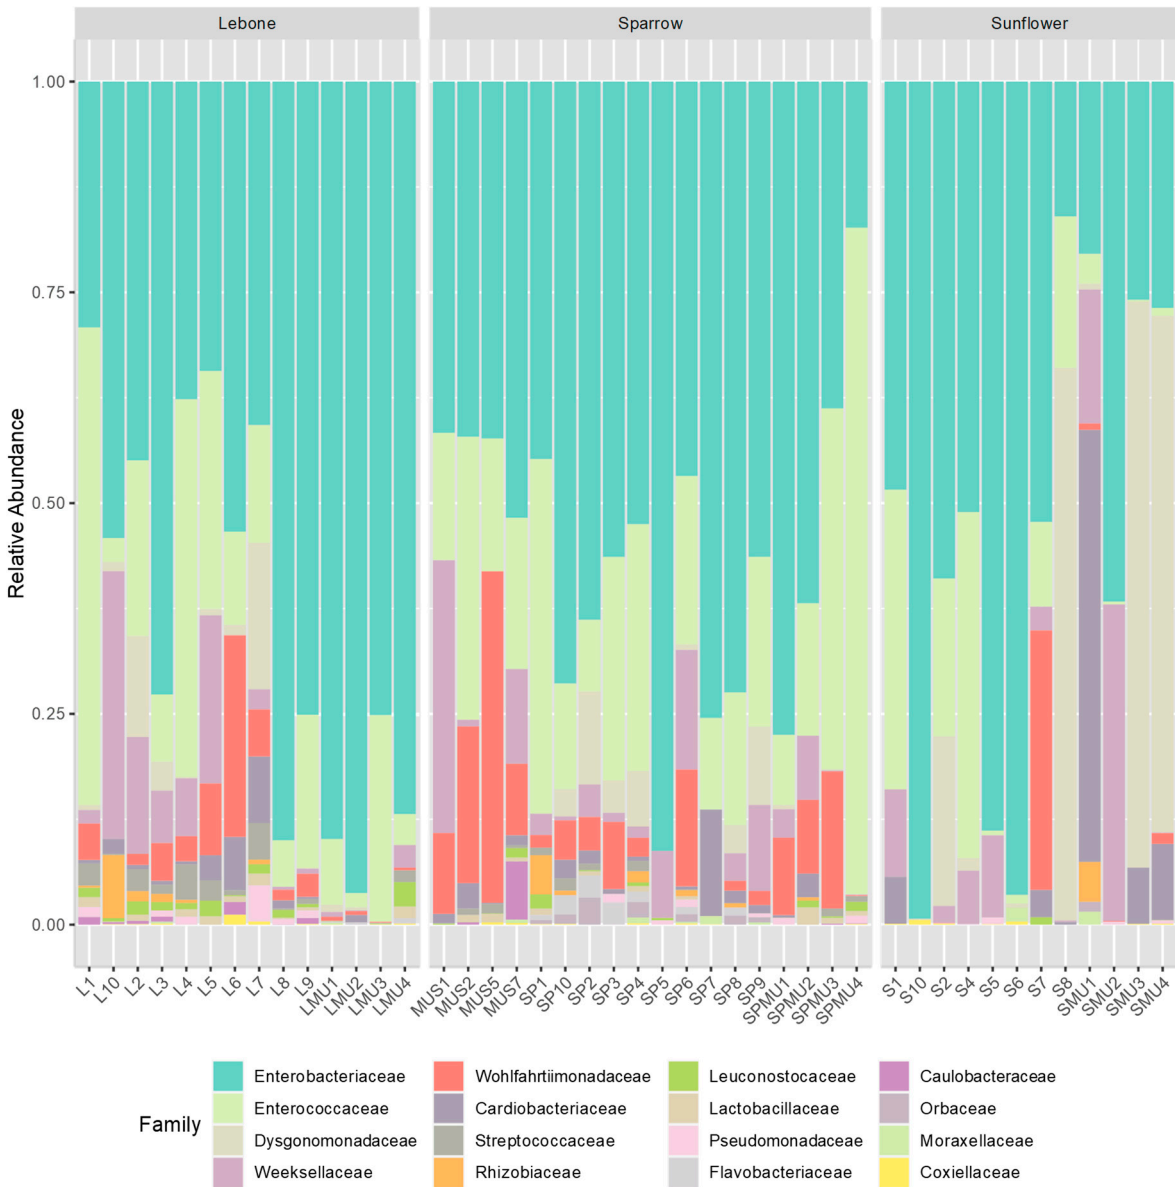

**Figure S3.** A stacked bar plot showing relative abundance of bacterial families detected from houseflies collected from three hospices in Bloemfontein and Johannesburg cities.

**Table S1.** Primer sequences specific to different antimicrobial resistant determinants in housefly DNA extracts

| Resistant Gene De-<br>tected            | Primer Direc-<br>tion | Sequence (5'–3')           | Annealing Temperature<br>(°C) | Amplicon Size (bp) | References |
|-----------------------------------------|-----------------------|----------------------------|-------------------------------|--------------------|------------|
| Macrolide antibiotic-resistant genes    |                       |                            |                               |                    |            |
| <i>ermB</i>                             | F                     | GCATTTAACGACGAAACTGGCT     | 61                            | 573                | [28]       |
|                                         | R                     | GACAATACTTGCTCATAAGTAATGGT |                               |                    |            |
| <i>mecA</i>                             | F                     | TAATAGTTGTAGTTGTCGGGTTTG   | 61                            | 733                | [28]       |
|                                         | R                     | TAACCTAATAGATGTGAAGTCGCT   |                               |                    |            |
| <i>vanA</i>                             | F                     | GAAATCAACCATGTTGATGTAGCA   | 61                            | 572                | [28]       |
|                                         | R                     | TTTGCCGTTTCCTGTATCCGT      |                               |                    |            |
| β-lactam antibiotic-resistant genes     |                       |                            |                               |                    |            |
| CARB                                    | F                     | CAAGTACTTTYAAAACAATAGC     | 46                            | 534                | [28]       |
|                                         | R                     | GCTGTAATACTCCKAGCAC        |                               |                    |            |
| TEM                                     | F                     | AAAGATGCTGAAGATCA TTTGG-   | 44                            | 425                | [28]       |
|                                         | R                     | TATGGCTTCATTC              |                               |                    |            |
| SHV                                     | F                     | GCGAAAGCCAGCTGTCGGGC       | 62                            | 304                | [28]       |
|                                         | R                     | GATTGGCGGCGCTGTTATCGC      |                               |                    |            |
| Tetracycline antibiotic-resistant genes |                       |                            |                               |                    |            |
| <i>tetA</i>                             | F                     | GCGCTNTATGCGTTGATGCA       | 62                            | 387                | [28]       |
|                                         | R                     | ACAGCCCGTCAGGAAATT         |                               |                    |            |
| <i>tetW</i>                             | F                     | GAGAGCCTGCTATATGCCAGC      | 64                            | 168                | [28]       |
|                                         | R                     | GGGCGTATCCACAATGTTAAC      |                               |                    |            |
| <i>tetX</i>                             | F                     | CCGACACGGAAGTTGAAGAA CCTT- | 60                            | 468                | [28]       |
|                                         | R                     | GGTGAGATGCCATTAGC          |                               |                    |            |
| Integrans                               |                       |                            |                               |                    |            |
| <i>intI</i>                             | F                     | GATGCCTGCTTGTTCTAC         | 55                            | 558                | [60]       |
|                                         | R                     | GCCTTGCTGTTCTTCTAC         |                               |                    |            |
| <i>intII</i>                            | F                     | GTAGCAAACGAGTGACGAAATG     | 62                            | 788                | [61]       |
|                                         | R                     | CACGGATATGCGACAAAAAGGT     |                               |                    |            |
| 16S <i>rRNA</i>                         |                       |                            |                               |                    |            |
| 16S <i>rRNA</i>                         | F                     | ATGGCTGTCGTCAGCT           | -                             | 440                | [62]       |
|                                         | R                     | ACGGGCGGTGTGTAC            |                               |                    |            |

## Virulence

## genes

|             |       |                             |    |      |      |
|-------------|-------|-----------------------------|----|------|------|
| <i>invA</i> | invA  | GTGAAATTATCGCCACGTTTCGGGCAA | 53 | 284  | [63] |
|             | 139   | TCATCGCACCGTCAAAGGAACC      |    |      |      |
|             | invA  |                             |    |      |      |
|             | 141   |                             |    |      |      |
| <i>sefA</i> | S1    | GCCGTACACGAGCTTATAGA        | 53 | 250  | [63] |
|             | S4    | ACCTACAGGGGCACAATAAC        |    |      |      |
| <i>fliC</i> | Fli15 | CGGTGTTGCCAGGTTGGTAAT       | 53 | 620  | [63] |
|             | Typ04 | ACTGGTAAAGATGGCT            |    |      |      |
| <i>uge</i>  | F     | TCT TCA CGC CTT CCT TCA CT  | 54 | 534  | [64] |
|             | R     | GAT CAT CCG GTC TCC CTG TA  |    |      |      |
| <i>magA</i> | F     | GGT GCT CTT TAC ATC ATT GC  | 59 | 1280 | [64] |
|             | R     | GCA ATG GCC ATT TGC GTT AG  |    |      |      |
| <i>kfu</i>  | F     | GAA GTG ACG CTG TTT CTG GC  | 54 | 797  | [64] |
|             | R     | TTT CGT GTG GCC AGT GAC TC  |    |      |      |
